# Supplementary material
Source: publisher figshare collection journal article supplement (https://plos.figshare.com/articles/dataset/_/137063)
Supplement: Supplementary file 1 [file 1]

Archive with 11 entries (11 files):
- Figure_S1.tif
- Figure_S2.tif
- Figure_S3.tif
- Figure_S4.tif
- Figure_S5.tif
- Figure_S6.tif
- Figure_S7.tif
- Figure_S8.tif
- Figure_S9.tif
- Movie_S1.mpeg
- Text_S1.pdf
